# Supplementary material
Source: PubMed Central journal article supplement (PMC3434861)
Supplement: supp_125.13.3153_JCS100511.pdf [file supp_125.13.3153_JCS100511.pdf]

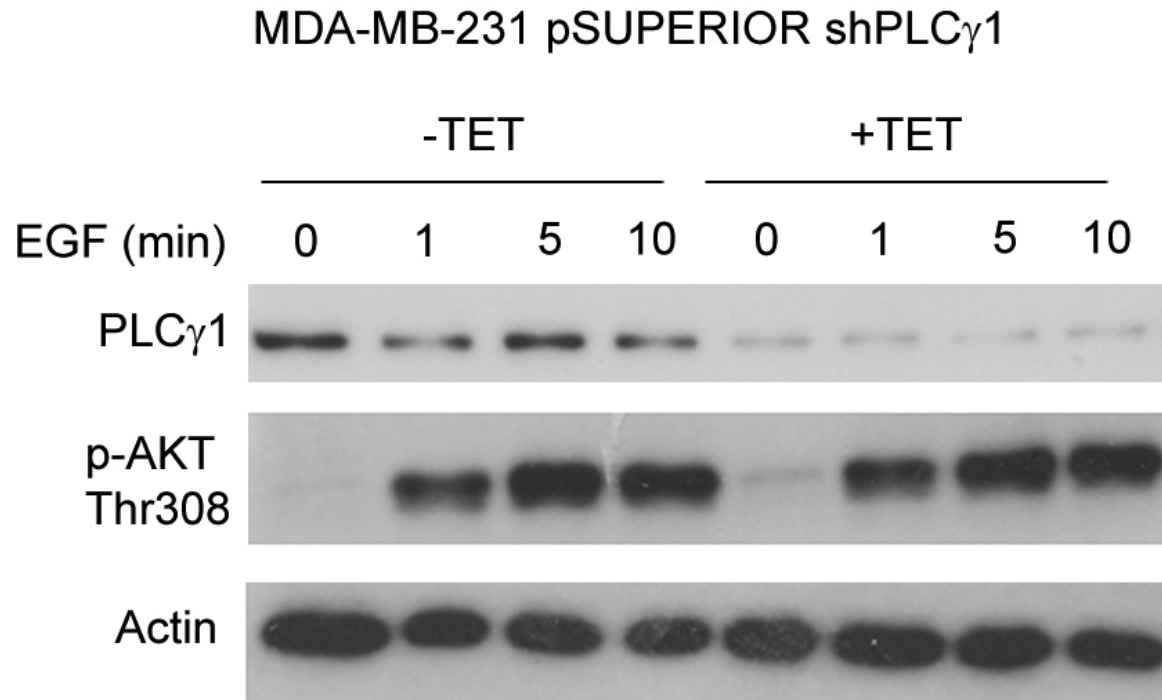

**Fig. S1. PLC $\gamma$ 1 does not activate PDK1.** Western blot analysis of lysates from serum-starved MDA-MB-231 expressing an inducible TET-Off-PLC $\gamma$ 1 targeting system untreated or treated with EGF for the indicated times in the presence or absence of tetracycline. Levels of PLC $\gamma$ 1 and the PDK1-dependent phosphorylation of Akt at its residue Thr308 were determined by western blot analysis. Equal loading was confirmed using an anti-actin antibody.

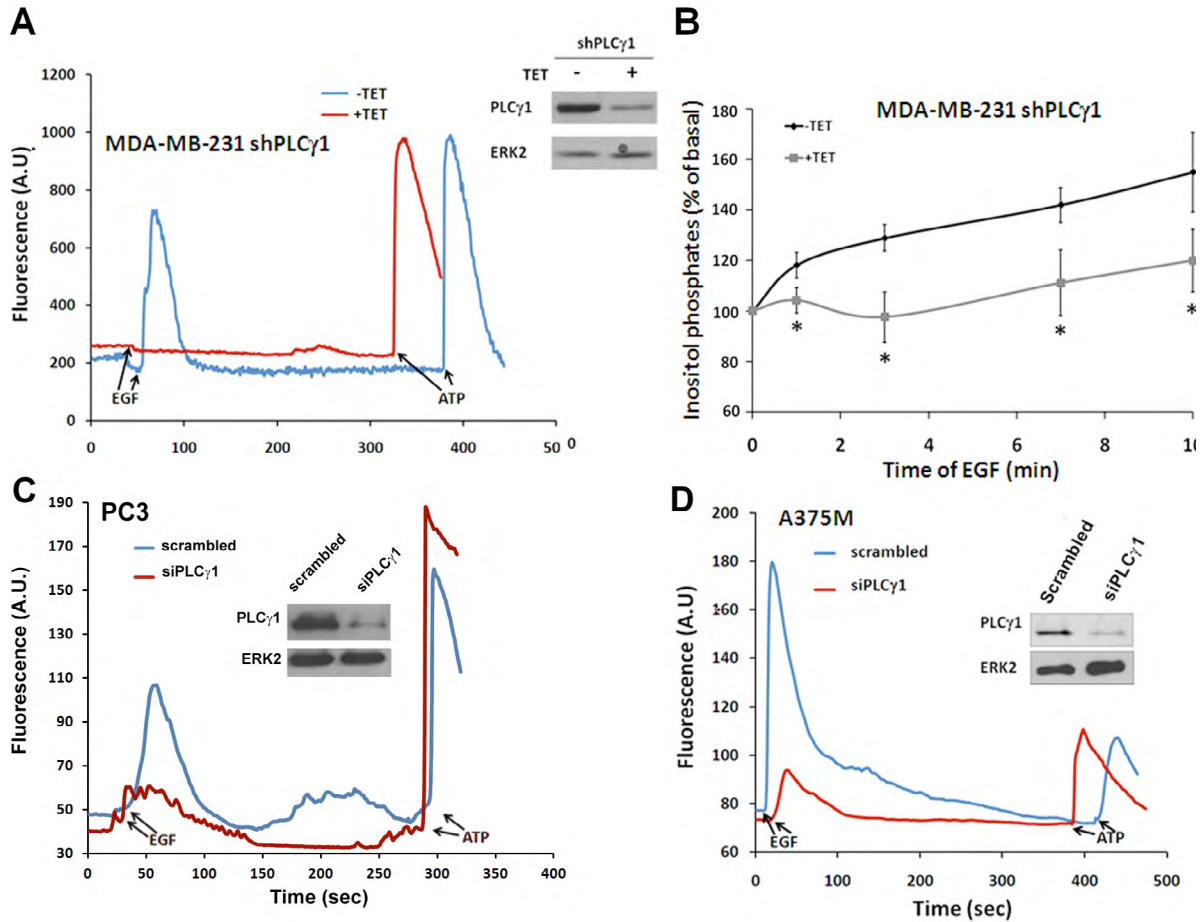

**Fig. S2. PLC $\gamma$ 1 and PDK1 regulate the EGF-induced increase of intracellular calcium and inositol phosphates accumulation.** (A) Intracellular calcium mobilization upon EGF stimulation in MDA-MB-231 expressing the inducible TET-Off-PLC $\gamma$ 1 targeting system. Data are from one experiment representative of three independent experiments. Levels of PLC $\gamma$ 1 upon treatment with tetracycline are shown. (B) Inositol phosphates accumulation induced by EGF stimulation in MDA-MB-231 expressing the inducible TET-Off-PLC $\gamma$ 1 targeting system. Data are means  $\pm$  s.e.m. from four independent experiments.  $*P < 0.05$ . (C) Intracellular calcium mobilization measured upon EGF stimulation of PC3 cells. Cells were transiently transfected with siRNA targeting PLC $\gamma$ 1 or PDK1 or with scrambled siRNA as control and intracellular calcium measurements were performed in the three sets of cells. For clarity, results from cells transfected with PLC $\gamma$ 1-targeting siRNA are presented here whereas results from cells transfected with PDK1-targeting siRNA are presented in a separated graph in Fig. 2A. Results from cells transfected with scrambled siRNA which were used as control for both PDK1 and PLC $\gamma$ 1 siRNAs-expressing cells are presented in both graphs. Western blot shows protein level of PLC $\gamma$ 1 in transfected cells. Data are from one experiment representative of four independent experiments. (D) Intracellular calcium mobilization measured upon EGF stimulation of A375M cells. Cells were transiently transfected with siRNAs targeting PLC $\gamma$ 1 or PDK1 or scrambled siRNA as control. Data are from one experiment representative of three independent experiments. Western blot shows protein level of PLC $\gamma$ 1 in transfected cells. For clarity, results from cells transfected with PLC $\gamma$ 1-targeting siRNAs are presented here whereas results from cells transfected with PDK1-targeting are presented in Fig.2C.

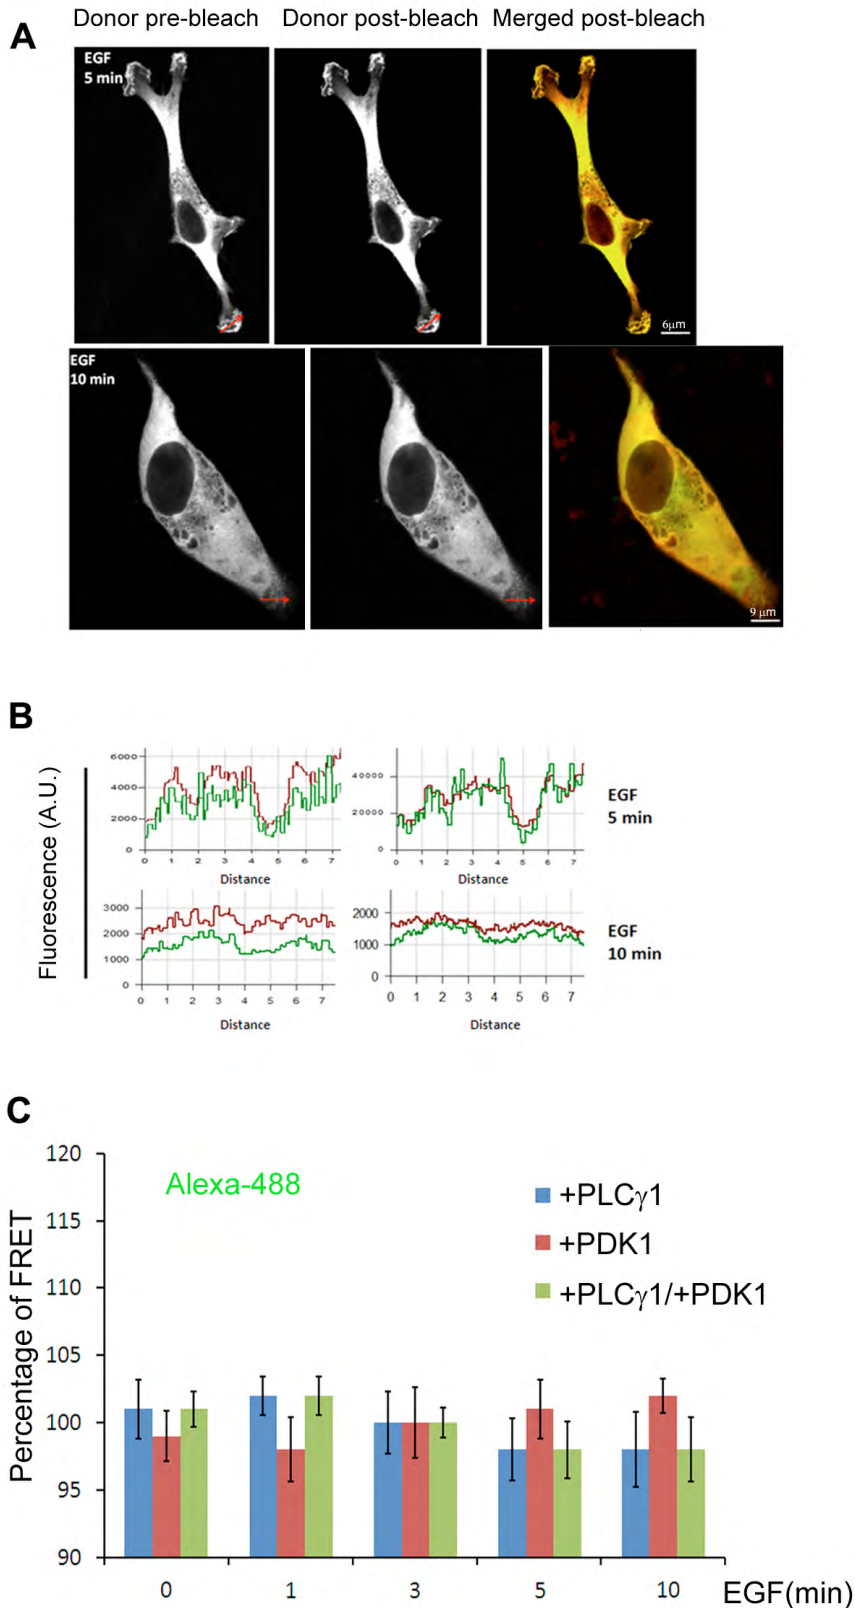

**Fig. S3. FRET analysis of PLC $\gamma$ 1 and PDK1 association.** (A,B) Confocal microscopy images of FRET analysis in serum-starved MDA-MB-231 cells co-expressing PLC $\gamma$ 1 (green) and PDK1 (red) untreated or stimulated with EGF for 5 and 10 minutes. The green and red lines in the charts show the fluorescence of donor and acceptor respectively, before and after acceptor photobleaching measured along the indicated red arrow in cells shown in the panel above. (C) Quantification of FRET measured by acceptor photobleaching in serum-starved MDA-MB-231 overexpressing PLC $\gamma$ 1 alone (+PLC $\gamma$ 1) or PDK1 alone (+PDK1) or co-expressing PLC $\gamma$ 1 and PDK1 (+PLC $\gamma$ 1/+PDK1), untreated or treated with EGF for the indicated time points, single-stained with Alexa-488-conjugated secondary antibody. Graph is the means  $\pm$  s.e.m. from two independent experiments examining a total of 30 cells per time point.

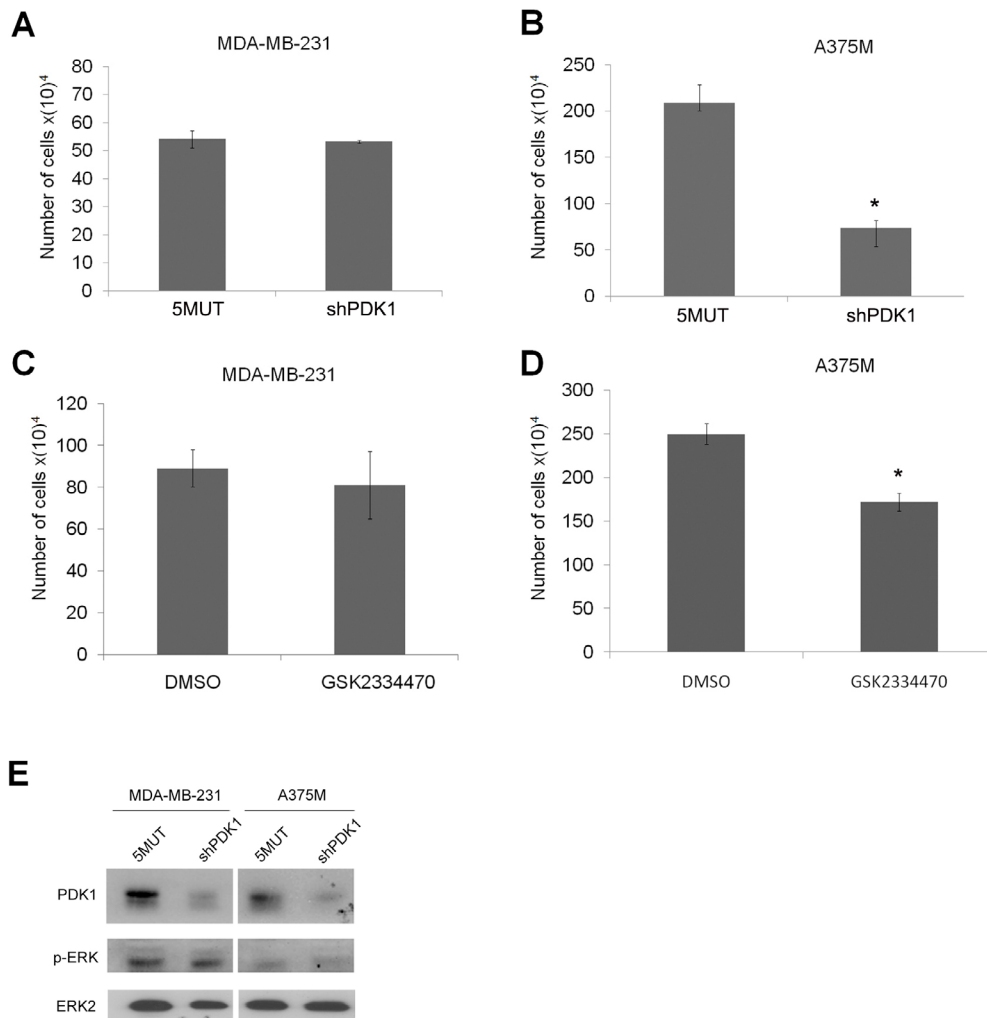

**Fig. S4. Effect of PDK1 on proliferation of MDA-MB-231 and A375M.** (A,B) Cell proliferation of MDA-MB-231 and A375M stably transfected with shRNA targeting PDK1 or the respective 5MUT control sequence was assessed by manual cell counting after 72 hours from plating in normal growing conditions. (C,D) Cell proliferation of MDA-MB-231 and A375M was assessed by manual cell counting after 72 hours of treatment with 1  $\mu$ M GSK2334470 in normal growing conditions. Data in the right panel are means  $\pm$  s.e.m. from three independent experiments. \* $P$ <0.05. (E) Western blot analysis of lysates of MDA-MB-231 and A375M stably transfected with shRNA targeting PDK1 or a 5MUT non targeting sequence, cultured in normal growing media showing phosphorylation level of ERK. Total ERK levels were assessed after membrane stripping.
